# Supplementary material for: Reactive modeling of the initial stages of alkoxysilane polycondensation: effects of precursor molecule structure and solution composition
Source: Royal Society of Chemistry journal article supplement (doi:10.1039/c5sm00964b), 2015-01-01
Supplement: c5sm00964b1.pdf [file c5sm00964b1.pdf]

Reactive MD-force field: Parameters from Josh Deetz and Roland Faller J. Phys. Chem. B, 2014, 118 (37), pp 10966-10978

```
39      ! Number of general parameters
50.0000 !Overcoordination parameter
11.0940 !Overcoordination parameter
26.5405 !Valency angle conjugation parameter
 1.5105 !Triple bond stabilisation parameter
 6.6630 !Triple bond stabilisation parameter
 0.0000 !C2-correction
 1.1770 !Undercoordination parameter
 4.6000 !Triple bond stabilisation parameter
13.0070 !Undercoordination parameter
13.5840 !Undercoordination parameter
-70.1292 !Triple bond stabilization energy
 0.0000 !Lower Taper-radius
10.0000 !Upper Taper-radius
 2.8793 !Not used
38.1630 !Valency undercoordination
 6.2250 !Valency angle/lone pair parameter
 1.2120 !Valency angle
 1.9920 !Valency angle parameter
 6.1431 !Not used
 6.9290 !Double bond/angle parameter
 0.3989 !Double bond/angle parameter: overcoord
 3.9954 !Double bond/angle parameter: overcoord
-2.4837 !Not used
 5.5360 !Torsion/BO parameter
 9.3570 !Torsion overcoordination
 1.7770 !Torsion overcoordination
-1.2327 !Conjugation 0 (not used)
 2.0960 !Conjugation
 1.5591 !vdWaals shielding
 0.1000 !Cutoff for bond order (*100)
 2.1365 !Valency angle conjugation parameter
 0.6300 !Overcoordination parameter
50.0001 !Overcoordination parameter
 1.6300 !Valency/lone pair parameter
 0.5000 !Not used
20.0000 !Not used
 5.0000 !Molecular energy (not used)
 0.0000 !Molecular energy (not used)
 2.7150 !Valency angle conjugation parameter
 8      ! Nr of atoms; cov.r;
valency;a.m;Rvdw;Evdw;gammaEEM;cov.r2;#
      alfa;gammavdW;valency;Eunder;Eover;chiEEM;etaEEM;n.u.
      cov r3;Elp;Heat inc.;n.u.;n.u.;n.u.;n.u.
      ov/un;val1;n.u.;val3,vval4
C      1.3825  4.0000  12.0000  1.9133  0.1853  0.7460
1.1359  4.0000
      9.7602  2.1346  4.0000  33.2433  79.5548  5.8070
6.5250  0.0000
```

|        |          |         |          |         |          |         |   |
|--------|----------|---------|----------|---------|----------|---------|---|
|        | 1.2104   | 0.0000  | 199.0303 | 8.6991  | 34.7289  | 13.3894 |   |
| 0.8563 | 0.0000   |         |          |         |          |         |   |
|        | -2.8983  | 2.5000  | 1.0564   | 4.0000  | 2.9663   | 0.0000  |   |
| 0.0000 | 0.0000   |         |          |         |          |         |   |
| H      | 0.8690   | 1.0000  | 1.0080   | 1.7900  | 0.0420   | 1.0000  | - |
| 0.1000 | 1.0000   |         |          |         |          |         |   |
|        | 9.3060   | 4.5180  | 1.0000   | 0.0000  | 121.1250 | 4.7340  |   |
| 7.7690 | 1.0000   |         |          |         |          |         |   |
|        | -0.1000  | 0.0000  | 62.4879  | 1.8210  | 3.5300   | 0.7530  |   |
| 1.0698 | 0.0000   |         |          |         |          |         |   |
|        | -17.8900 | 2.1360  | 1.0338   | 1.0000  | 2.6940   | 0.0000  |   |
| 0.0000 | 0.0000   |         |          |         |          |         |   |
| O      | 1.0050   | 2.0000  | 15.9990  | 2.0930  | 0.0990   | 1.0000  |   |
| 1.0420 | 6.0000   |         |          |         |          |         |   |
|        | 9.9880   | 8.6620  | 4.0000   | 29.7160 | 116.0768 | 8.4960  |   |
| 8.3930 | 2.0000   |         |          |         |          |         |   |
|        | 0.9090   | 1.0000  | 60.8726  | 18.6790 | 3.2980   | 0.3480  |   |
| 0.9745 | 0.0000   |         |          |         |          |         |   |
|        | -3.0650  | 2.7640  | 1.0493   | 4.0000  | 2.2910   | 0.0000  |   |
| 0.0000 | 0.0000   |         |          |         |          |         |   |
| N      | 1.2333   | 3.0000  | 14.0000  | 1.9324  | 0.1376   | 0.8596  |   |
| 1.1748 | 5.0000   |         |          |         |          |         |   |
|        | 10.0667  | 7.8431  | 4.0000   | 32.2482 | 100.0000 | 6.8418  |   |
| 6.3404 | 2.0000   |         |          |         |          |         |   |
|        | 1.0433   | 13.7673 | 119.9837 | 2.1961  | 3.0696   | 2.7683  |   |
| 0.9745 | 0.0000   |         |          |         |          |         |   |
|        | -4.3875  | 2.6192  | 1.0183   | 4.0000  | 2.8793   | 0.0000  |   |
| 0.0000 | 0.0000   |         |          |         |          |         |   |
| S      | 1.9401   | 2.0000  | 32.0600  | 2.0629  | 0.2095   | 1.0316  |   |
| 1.5483 | 6.0000   |         |          |         |          |         |   |
|        | 9.9553   | 4.9055  | 4.0000   | 52.9998 | 112.1416 | 6.5181  |   |
| 8.2345 | 2.0000   |         |          |         |          |         |   |
|        | 1.4601   | 9.6977  | 71.1843  | 5.7487  | 23.2859  | 12.7147 |   |
| 0.9745 | 0.0000   |         |          |         |          |         |   |
|        | -11.0200 | 2.7266  | 1.0338   | 6.2998  | 2.8793   | 0.0000  |   |
| 0.0000 | 0.0000   |         |          |         |          |         |   |
| Si     | 1.8340   | 4.0000  | 28.0600  | 1.9770  | 0.1330   | 1.0190  |   |
| 1.5430 | 4.0000   |         |          |         |          |         |   |
|        | 12.3020  | 1.5590  | 4.0000   | 13.2990 | 136.4845 | 1.9050  |   |
| 6.8960 | 0.0000   |         |          |         |          |         |   |
|        | -1.0000  | 0.0000  | 126.5182 | 3.2410  | 7.9170   | 0.2320  |   |
| 0.8563 | 0.0000   |         |          |         |          |         |   |
|        | -3.5720  | 3.9070  | 1.0338   | 6.8600  | 2.5490   | 0.0000  |   |
| 0.0000 | 0.0000   |         |          |         |          |         |   |
| Hc     | 0.7853   | 1.0000  | 1.0080   | 1.5904  | 0.0419   | 1.0206  | - |
| 0.1000 | 1.0000   |         |          |         |          |         |   |
|        | 9.3558   | 5.0519  | 1.0000   | 0.0000  | 121.1251 | 5.3201  |   |
| 7.4367 | 1.0000   |         |          |         |          |         |   |
|        | -0.1000  | 0.0000  | 62.4880  | 1.9772  | 3.3518   | 0.7572  |   |
| 1.0699 | 0.0000   |         |          |         |          |         |   |
|        | -15.7684 | 2.1489  | 1.0339   | 1.0000  | 2.8794   | 0.0000  |   |
| 0.0000 | 0.0000   |         |          |         |          |         |   |

|         |                                                                                               |          |          |          |         |         |        |
|---------|-----------------------------------------------------------------------------------------------|----------|----------|----------|---------|---------|--------|
| X       | -0.1000                                                                                       | 2.0000   | 1.0080   | 2.0000   | 0.0000  | 1.0000  | -      |
| 0.1000  | 6.0000                                                                                        |          |          |          |         |         |        |
|         | 10.0000                                                                                       | 2.5000   | 4.0000   | 0.0000   | 0.0000  | 8.5000  |        |
| 15.0000 | 0.0000                                                                                        |          |          |          |         |         |        |
|         | -0.1000                                                                                       | 0.0000   | 127.6226 | 8.7410   | 13.3640 | 0.6690  |        |
| 0.9745  | 0.0000                                                                                        |          |          |          |         |         |        |
|         | -11.0000                                                                                      | 2.7466   | 1.0338   | 6.2998   | 2.8793  | 0.0000  |        |
| 0.0000  | 0.0000                                                                                        |          |          |          |         |         |        |
| 24      | ! Nr of bonds; Edis1;LPpen;n.u.;pbe1;pbo5;13corr;pbo6<br>pbe2;pbo3;pbo4;n.u.;pbo1;pbo2;ovcorr |          |          |          |         |         |        |
| 1       | 1                                                                                             | 156.5953 | 100.0397 | 80.0000  | -0.8157 | -0.4591 | 1.0000 |
| 37.7369 |                                                                                               | 0.4235   |          |          |         |         |        |
|         |                                                                                               | 0.4527   | -0.1000  | 9.2605   | 1.0000  | -0.0750 | 6.8316 |
| 1.0000  |                                                                                               | 0.0000   |          |          |         |         |        |
| 1       | 2                                                                                             | 170.2316 | 0.0000   | 0.0000   | -0.5931 | 0.0000  | 1.0000 |
| 6.0000  |                                                                                               | 0.7140   |          |          |         |         |        |
|         |                                                                                               | 5.2267   | 1.0000   | 0.0000   | 1.0000  | -0.0500 | 6.8315 |
| 0.0000  |                                                                                               | 0.0000   |          |          |         |         |        |
| 2       | 2                                                                                             | 156.0973 | 0.0000   | 0.0000   | -0.1377 | 0.0000  | 1.0000 |
| 6.0000  |                                                                                               | 0.8240   |          |          |         |         |        |
|         |                                                                                               | 2.9907   | 1.0000   | 0.0000   | 1.0000  | -0.0593 | 4.8358 |
| 0.0000  |                                                                                               | 0.0000   |          |          |         |         |        |
| 1       | 3                                                                                             | 160.4802 | 105.1693 | 23.3059  | -0.3873 | -0.1613 | 1.0000 |
| 10.8851 |                                                                                               | 1.0000   |          |          |         |         |        |
|         |                                                                                               | 0.5341   | -0.3174  | 7.0303   | 1.0000  | -0.1463 | 5.2913 |
| 0.0000  |                                                                                               | 0.0000   |          |          |         |         |        |
| 3       | 3                                                                                             | 60.1463  | 176.6202 | 51.1430  | -0.2802 | -0.1244 | 1.0000 |
| 29.6439 |                                                                                               | 0.9114   |          |          |         |         |        |
|         |                                                                                               | 0.2441   | -0.1239  | 7.6487   | 1.0000  | -0.1302 | 6.2919 |
| 1.0000  |                                                                                               | 0.0000   |          |          |         |         |        |
| 1       | 4                                                                                             | 134.1215 | 140.2179 | 79.9745  | 0.0163  | -0.1428 | 1.0000 |
| 27.0617 |                                                                                               | 0.2000   |          |          |         |         |        |
|         |                                                                                               | 0.1387   | -0.3681  | 7.1611   | 1.0000  | -0.1000 | 5.0825 |
| 1.0000  |                                                                                               | 0.0000   |          |          |         |         |        |
| 3       | 4                                                                                             | 130.8596 | 169.4551 | 40.0000  | 0.3837  | -0.1639 | 1.0000 |
| 35.0000 |                                                                                               | 0.2000   |          |          |         |         |        |
|         |                                                                                               | 1.0000   | -0.3579  | 7.0004   | 1.0000  | -0.1193 | 6.8773 |
| 1.0000  |                                                                                               | 0.0000   |          |          |         |         |        |
| 4       | 4                                                                                             | 157.9384 | 82.5526  | 152.5336 | 0.4010  | -0.1034 | 1.0000 |
| 12.4261 |                                                                                               | 0.5828   |          |          |         |         |        |
|         |                                                                                               | 0.1578   | -0.1509  | 11.9186  | 1.0000  | -0.0861 | 5.4271 |
| 1.0000  |                                                                                               | 0.0000   |          |          |         |         |        |
| 2       | 3                                                                                             | 197.9250 | 0.0000   | 0.0000   | -0.6060 | 0.0000  | 1.0000 |
| 6.0050  |                                                                                               | 0.5514   |          |          |         |         |        |
|         |                                                                                               | 1.2450   | 1.0000   | 0.0000   | 1.0000  | -0.0570 | 4.0190 |
| 0.0000  |                                                                                               | 0.0000   |          |          |         |         |        |
| 2       | 4                                                                                             | 231.8173 | 0.0000   | 0.0000   | -0.3364 | 0.0000  | 1.0000 |
| 6.0000  |                                                                                               | 0.4402   |          |          |         |         |        |
|         |                                                                                               | 8.8910   | 1.0000   | 0.0000   | 1.0000  | -0.0327 | 6.5754 |
| 0.0000  |                                                                                               | 0.0000   |          |          |         |         |        |
| 1       | 5                                                                                             | 129.1942 | 74.3656  | 55.2528  | 0.1066  | -0.5211 | 1.0000 |
| 18.9617 |                                                                                               | 0.5950   |          |          |         |         |        |

|         |     |          |         |         |         |         |        |
|---------|-----|----------|---------|---------|---------|---------|--------|
|         |     | 0.2950   | -0.2398 | 8.0314  | 1.0000  | -0.1019 | 5.6754 |
| 1.0000  |     | 0.0000   |         |         |         |         |        |
|         | 2 5 | 151.3159 | 0.0000  | 0.0000  | -0.4644 | 0.0000  | 1.0000 |
| 6.0000  |     | 0.5950   |         |         |         |         |        |
|         |     | 9.4365   | 1.0000  | 0.0000  | 1.0000  | -0.0303 | 7.0100 |
| 1.0000  |     | 0.0000   |         |         |         |         |        |
|         | 3 5 | 0.0000   | 0.0000  | 0.0000  | 0.5563  | -0.4038 | 1.0000 |
| 49.5611 |     | 0.6000   |         |         |         |         |        |
|         |     | 0.4259   | -0.4577 | 12.7569 | 1.0000  | -0.1100 | 7.1145 |
| 1.0000  |     | 0.0000   |         |         |         |         |        |
|         | 4 5 | 0.0000   | 0.0000  | 0.0000  | 0.4438  | -0.2034 | 1.0000 |
| 40.3399 |     | 0.6000   |         |         |         |         |        |
|         |     | 0.3296   | -0.3153 | 9.1227  | 1.0000  | -0.1805 | 5.6864 |
| 1.0000  |     | 0.0000   |         |         |         |         |        |
|         | 5 5 | 96.1871  | 93.7006 | 68.6860 | 0.0955  | -0.4781 | 1.0000 |
| 17.8574 |     | 0.6000   |         |         |         |         |        |
|         |     | 0.2723   | -0.2373 | 9.7875  | 1.0000  | -0.0950 | 6.4757 |
| 1.0000  |     | 0.0000   |         |         |         |         |        |
|         | 1 6 | 90.9518  | 9.0694  | 0.0000  | 0.3171  | -0.5558 | 1.0000 |
| 17.2117 |     | 0.5716   |         |         |         |         |        |
|         |     | 0.7279   | -0.2078 | 7.7261  | 1.0000  | -0.1095 | 5.4535 |
| 1.0000  |     | 0.0000   |         |         |         |         |        |
|         | 2 6 | 150.7718 | 0.0000  | 0.0000  | -0.3685 | 0.0000  | 1.0000 |
| 6.0000  |     | 0.8896   |         |         |         |         |        |
|         |     | 18.0431  | 1.0000  | 0.0000  | 1.0000  | -0.0592 | 6.3196 |
| 0.0000  |     | 0.0000   |         |         |         |         |        |
|         | 3 6 | 220.2450 | 77.4510 | 44.5790 | -0.3420 | -0.3000 | 1.0000 |
| 36.5040 |     | 0.3161   |         |         |         |         |        |
|         |     | 0.9070   | -0.3490 | 5.0380  | 1.0000  | -0.3740 | 4.5070 |
| 1.0000  |     | 0.0000   |         |         |         |         |        |
|         | 6 6 | 72.8867  | 50.0318 | 30.0000 | 0.9983  | -0.3000 | 1.0000 |
| 16.0000 |     | 0.1000   |         |         |         |         |        |
|         |     | 1.0538   | -0.0447 | 10.6176 | 1.0000  | -0.1452 | 8.0404 |
| 0.0000  |     | 0.0000   |         |         |         |         |        |
|         | 1 7 | 170.2317 | 0.0000  | 0.0000  | -0.5932 | 0.0000  | 1.0000 |
| 6.0000  |     | 0.7141   |         |         |         |         |        |
|         |     | 5.2268   | 1.0000  | 0.0000  | 1.0000  | -0.0500 | 6.8316 |
| 0.0000  |     | 0.0000   |         |         |         |         |        |
|         | 2 7 | 156.0974 | 0.0000  | 0.0000  | -0.1378 | 0.0000  | 1.0000 |
| 6.0000  |     | 0.8241   |         |         |         |         |        |
|         |     | 2.9908   | 1.0000  | 0.0000  | 1.0000  | -0.0594 | 4.8359 |
| 0.0000  |     | 0.0000   |         |         |         |         |        |
|         | 7 7 | 156.0975 | 0.0000  | 0.0000  | -0.1379 | 0.0000  | 1.0000 |
| 6.0000  |     | 0.8242   |         |         |         |         |        |
|         |     | 2.9909   | 1.0000  | 0.0000  | 1.0000  | -0.0595 | 4.8360 |
| 0.0000  |     | 0.0000   |         |         |         |         |        |
|         | 3 7 | 180.4374 | 0.0000  | 0.0000  | -0.8075 | 0.0000  | 1.0000 |
| 6.0000  |     | 0.5515   |         |         |         |         |        |
|         |     | 1.2491   | 1.0000  | 0.0000  | 1.0000  | -0.0658 | 5.0452 |
| 0.0000  |     | 0.0000   |         |         |         |         |        |
|         | 6 7 | 146.7970 | 0.0000  | 0.0000  | -0.3420 | 0.0000  | 1.0000 |
| 6.0840  |     | 0.8898   |         |         |         |         |        |



|        |   |   |   |          |         |        |          |        |         |
|--------|---|---|---|----------|---------|--------|----------|--------|---------|
| 1.0783 | 1 | 3 | 4 | 82.4890  | 31.4554 | 0.9953 | 0.0000   | 1.6310 | 0.0000  |
| 1.0783 | 3 | 3 | 3 | 80.7324  | 30.4554 | 0.9953 | 0.0000   | 1.6310 | 50.0000 |
| 1.0783 | 3 | 3 | 4 | 84.3637  | 31.4554 | 0.9953 | 0.0000   | 1.6310 | 0.0000  |
| 1.1519 | 4 | 3 | 4 | 89.7071  | 31.4554 | 0.9953 | 0.0000   | 1.6310 | 0.0000  |
| 1.2900 | 1 | 3 | 2 | 59.0670  | 27.7220 | 0.4270 | 0.0000   | 0.5560 | 0.0000  |
| 1.3023 | 2 | 3 | 3 | 84.9468  | 23.3540 | 1.5057 | 0.0000   | 2.6374 | 0.0000  |
| 1.0500 | 2 | 3 | 4 | 75.6201  | 18.7919 | 0.9833 | 0.0000   | 0.1218 | 0.0000  |
| 0.8820 | 2 | 3 | 2 | 84.2260  | 11.4170 | 1.1890 | 0.0000   | 1.0000 | 0.0000  |
| 1.0500 | 1 | 4 | 1 | 66.0330  | 22.0295 | 1.4442 | 0.0000   | 1.6777 | 0.0000  |
| 1.0500 | 1 | 4 | 3 | 103.3204 | 33.0381 | 0.5787 | 0.0000   | 1.6777 | 0.0000  |
| 1.0500 | 1 | 4 | 4 | 104.1335 | 8.6043  | 1.6495 | 0.0000   | 1.6777 | 0.0000  |
| 1.0500 | 3 | 4 | 3 | 74.1978  | 42.1786 | 1.7845 | -18.0069 | 1.6777 | 0.0000  |
| 1.0500 | 3 | 4 | 4 | 74.8600  | 43.7354 | 1.1572 | -0.9193  | 1.6777 | 0.0000  |
| 1.0500 | 4 | 4 | 4 | 75.0538  | 14.8267 | 5.2794 | 0.0000   | 1.6777 | 0.0000  |
| 1.0369 | 1 | 4 | 2 | 69.1106  | 25.5067 | 1.1003 | 0.0000   | 0.0222 | 0.0000  |
| 1.0369 | 2 | 4 | 3 | 81.3686  | 40.0712 | 2.2396 | 0.0000   | 0.0222 | 0.0000  |
| 1.0500 | 2 | 4 | 4 | 83.0104  | 43.4766 | 1.5328 | 0.0000   | 0.0222 | 0.0000  |
| 1.1243 | 2 | 4 | 2 | 70.8687  | 12.0168 | 5.0132 | 0.0000   | 0.0222 | 0.0000  |
| 1.0400 | 1 | 2 | 3 | 0.0000   | 25.0000 | 3.0000 | 0.0000   | 1.0000 | 0.0000  |
| 1.0400 | 1 | 2 | 4 | 0.0000   | 0.0019  | 6.0000 | 0.0000   | 0.0000 | 0.0000  |
| 1.0400 | 1 | 2 | 5 | 0.0000   | 0.0019  | 6.0000 | 0.0000   | 0.0000 | 0.0000  |
| 0.8550 | 3 | 2 | 3 | 0.0000   | 0.0140  | 7.9490 | 0.0000   | 0.0000 | 0.0000  |
| 1.0400 | 3 | 2 | 4 | 0.0000   | 0.0019  | 6.0000 | 0.0000   | 0.0000 | 0.0000  |
| 1.0400 | 4 | 2 | 4 | 0.0000   | 0.0019  | 6.0000 | 0.0000   | 0.0000 | 0.0000  |
| 1.0400 | 2 | 2 | 3 | 0.0000   | 9.7025  | 6.0000 | 0.0000   | 0.0000 | 0.0000  |
| 1.0400 | 2 | 2 | 4 | 0.0000   | 0.0019  | 6.0000 | 0.0000   | 0.0000 | 0.0000  |







```

48      ! Nr of
torsions;at1;at2;at3;at4;;V1;V2;V3;V2(BO);vconj;n.u;n
 1 1 1 1 -0.2500 11.5822 0.1879 -4.7057 -2.2047
0.0000 0.0000
 1 1 1 2 -0.2500 31.2596 0.1709 -4.6391 -1.9002
0.0000 0.0000
 2 1 1 2 -0.1770 30.0252 0.4340 -5.0019 -2.0697
0.0000 0.0000
 1 1 1 3 -0.7098 22.2951 0.0060 -2.5000 -2.1688
0.0000 0.0000
 2 1 1 3 -0.3568 22.6472 0.6045 -4.0088 -1.0000
0.0000 0.0000
 3 1 1 3 -0.0528 6.8150 0.7498 -5.0913 -1.0000
0.0000 0.0000
 1 1 3 1 2.0007 25.5641 -0.0608 -2.6456 -1.1766
0.0000 0.0000
 1 1 3 2 -1.1953 42.1545 -1.0000 -8.0821 -1.0000
0.0000 0.0000
 2 1 3 1 -0.9284 34.3952 0.7285 -2.5440 -2.4641
0.0000 0.0000
 2 1 3 2 -2.5000 79.6980 1.0000 -3.5697 -2.7501
0.0000 0.0000
 1 1 3 3 -0.0179 5.0603 -0.1894 -2.5000 -2.0399
0.0000 0.0000
 2 1 3 3 -0.5583 80.0000 1.0000 -4.4000 -3.0000
0.0000 0.0000
 3 1 3 1 -2.5000 76.0427 -0.0141 -3.7586 -2.9000
0.0000 0.0000
 3 1 3 2 0.0345 78.9586 -0.6810 -4.1777 -3.0000
0.0000 0.0000
 3 1 3 3 -2.5000 66.3525 0.3986 -3.0293 -3.0000
0.0000 0.0000
 1 3 3 1 2.5000 -0.5332 1.0000 -3.5096 -2.9000
0.0000 0.0000
 1 3 3 2 -2.5000 3.3219 0.7180 -5.2021 -2.9330
0.0000 0.0000
 2 3 3 2 2.2500 -6.2288 1.0000 -2.6189 -1.0000
0.0000 0.0000
 1 3 3 3 0.0531 -17.3983 1.0000 -2.5000 -2.1584
0.0000 0.0000
 2 3 3 3 0.4723 -12.4144 -1.0000 -2.5000 -1.0000
0.0000 0.0000
 3 3 3 3 -2.5000 -25.0000 1.0000 -2.5000 -1.0000
0.0000 0.0000
 0 1 2 0 0.0000 0.0000 0.0000 0.0000 0.0000
0.0000 0.0000
 0 2 2 0 0.0000 0.0000 0.0000 0.0000 0.0000
0.0000 0.0000
 0 2 3 0 0.0000 0.0830 0.0190 -2.4490 0.0000
0.0000 0.0000
 0 1 1 0 0.0000 50.0000 0.3000 -4.0000 -2.0000
0.0000 0.0000

```

|        |        |   |   |                                                  |          |         |         |         |  |
|--------|--------|---|---|--------------------------------------------------|----------|---------|---------|---------|--|
| 0      | 3      | 3 | 0 | 0.5511                                           | 25.4150  | 1.1330  | -5.1903 | -1.0000 |  |
| 0.0000 | 0.0000 |   |   |                                                  |          |         |         |         |  |
| 0      | 1      | 4 | 0 | -2.4242                                          | 128.1636 | 0.3739  | -6.6098 | -2.0000 |  |
| 0.0000 | 0.0000 |   |   |                                                  |          |         |         |         |  |
| 0      | 2      | 4 | 0 | 0.0000                                           | 0.1000   | 0.0200  | -2.5415 | 0.0000  |  |
| 0.0000 | 0.0000 |   |   |                                                  |          |         |         |         |  |
| 0      | 3      | 4 | 0 | 1.4816                                           | 55.6641  | 0.0004  | -7.0465 | -2.7831 |  |
| 0.0000 | 0.0000 |   |   |                                                  |          |         |         |         |  |
| 0      | 4      | 4 | 0 | -0.3244                                          | 27.7086  | 0.0039  | -2.8272 | -2.0000 |  |
| 0.0000 | 0.0000 |   |   |                                                  |          |         |         |         |  |
| 4      | 1      | 4 | 4 | -5.5181                                          | 8.9706   | 0.0004  | -6.1782 | -2.0000 |  |
| 0.0000 | 0.0000 |   |   |                                                  |          |         |         |         |  |
| 0      | 1      | 5 | 0 | 0.1515                                           | 29.0501  | 0.0792  | -4.5064 | -1.0200 |  |
| 0.0000 | 0.0000 |   |   |                                                  |          |         |         |         |  |
| 0      | 5      | 5 | 0 | -0.0054                                          | 0.1000   | 0.1715  | -2.2256 | -1.0000 |  |
| 0.0000 | 0.0000 |   |   |                                                  |          |         |         |         |  |
| 0      | 2      | 5 | 0 | 0.0000                                           | 0.0000   | 0.0000  | 0.0000  | 0.0000  |  |
| 0.0000 | 0.0000 |   |   |                                                  |          |         |         |         |  |
| 1      | 1      | 1 | 7 | -0.2500                                          | 31.2596  | 0.1709  | -4.6391 | -1.9002 |  |
| 0.0000 | 0.0000 |   |   |                                                  |          |         |         |         |  |
| 7      | 1      | 1 | 7 | -0.1770                                          | 30.0252  | 0.4340  | -5.0019 | -2.0697 |  |
| 0.0000 | 0.0000 |   |   |                                                  |          |         |         |         |  |
| 7      | 1      | 1 | 3 | -0.3568                                          | 22.6472  | 0.6045  | -4.0088 | -1.0000 |  |
| 0.0000 | 0.0000 |   |   |                                                  |          |         |         |         |  |
| 1      | 1      | 3 | 7 | -1.1953                                          | 42.1545  | -1.0000 | -8.0821 | -1.0000 |  |
| 0.0000 | 0.0000 |   |   |                                                  |          |         |         |         |  |
| 7      | 1      | 3 | 1 | -0.9284                                          | 34.3952  | 0.7285  | -2.5440 | -2.4641 |  |
| 0.0000 | 0.0000 |   |   |                                                  |          |         |         |         |  |
| 7      | 1      | 3 | 7 | -2.5000                                          | 79.6980  | 1.0000  | -3.5697 | -2.7501 |  |
| 0.0000 | 0.0000 |   |   |                                                  |          |         |         |         |  |
| 7      | 1      | 3 | 3 | -0.5583                                          | 80.0000  | 1.0000  | -4.4000 | -3.0000 |  |
| 0.0000 | 0.0000 |   |   |                                                  |          |         |         |         |  |
| 3      | 1      | 3 | 7 | 0.0345                                           | 78.9586  | -0.6810 | -4.1777 | -3.0000 |  |
| 0.0000 | 0.0000 |   |   |                                                  |          |         |         |         |  |
| 1      | 3      | 3 | 7 | -2.5000                                          | 3.3219   | 0.7180  | -5.2021 | -2.9330 |  |
| 0.0000 | 0.0000 |   |   |                                                  |          |         |         |         |  |
| 7      | 3      | 3 | 7 | 2.2500                                           | -6.2288  | 1.0000  | -2.6189 | -1.0000 |  |
| 0.0000 | 0.0000 |   |   |                                                  |          |         |         |         |  |
| 7      | 3      | 3 | 3 | 0.4723                                           | -12.4144 | -1.0000 | -2.5000 | -1.0000 |  |
| 0.0000 | 0.0000 |   |   |                                                  |          |         |         |         |  |
| 0      | 1      | 7 | 0 | 0.0000                                           | 0.0000   | 0.0000  | 0.0000  | 0.0000  |  |
| 0.0000 | 0.0000 |   |   |                                                  |          |         |         |         |  |
| 0      | 7      | 7 | 0 | 0.0000                                           | 0.0000   | 0.0000  | 0.0000  | 0.0000  |  |
| 0.0000 | 0.0000 |   |   |                                                  |          |         |         |         |  |
| 0      | 7      | 3 | 0 | 0.0000                                           | 0.1000   | 0.0200  | -2.5415 | 0.0000  |  |
| 0.0000 | 0.0000 |   |   |                                                  |          |         |         |         |  |
| 10     |        |   |   | ! Nr of hydrogen bonds;at1;at2;at3;Rhb;Dehb;vhb1 |          |         |         |         |  |
| 3      | 2      | 3 |   | 1.2560                                           | -3.5540  | 1.4140  | 2.3840  |         |  |
| 3      | 7      | 3 |   | 1.9682                                           | -4.4628  | 1.7976  | 3.0000  |         |  |
| 3      | 2      | 4 |   | 2.0000                                           | -6.0000  | 1.7976  | 3.0000  |         |  |
| 4      | 2      | 3 |   | 1.2000                                           | -2.0000  | 1.7976  | 3.0000  |         |  |
| 4      | 2      | 4 |   | 1.2979                                           | -6.0000  | 1.7976  | 3.0000  |         |  |

|   |   |   |        |         |        |        |
|---|---|---|--------|---------|--------|--------|
| 3 | 2 | 5 | 1.5000 | -2.0000 | 1.7976 | 3.0000 |
| 4 | 2 | 5 | 1.5000 | -2.0000 | 1.7976 | 3.0000 |
| 5 | 2 | 3 | 1.5000 | -2.0000 | 1.7976 | 3.0000 |
| 5 | 2 | 4 | 1.5000 | -2.0000 | 1.7976 | 3.0000 |
| 5 | 2 | 5 | 1.5000 | -2.0000 | 1.7976 | 3.0000 |
